# Supplementary material
Source: PubMed Central journal article supplement (PMC2140109)

Supplementary figure 2

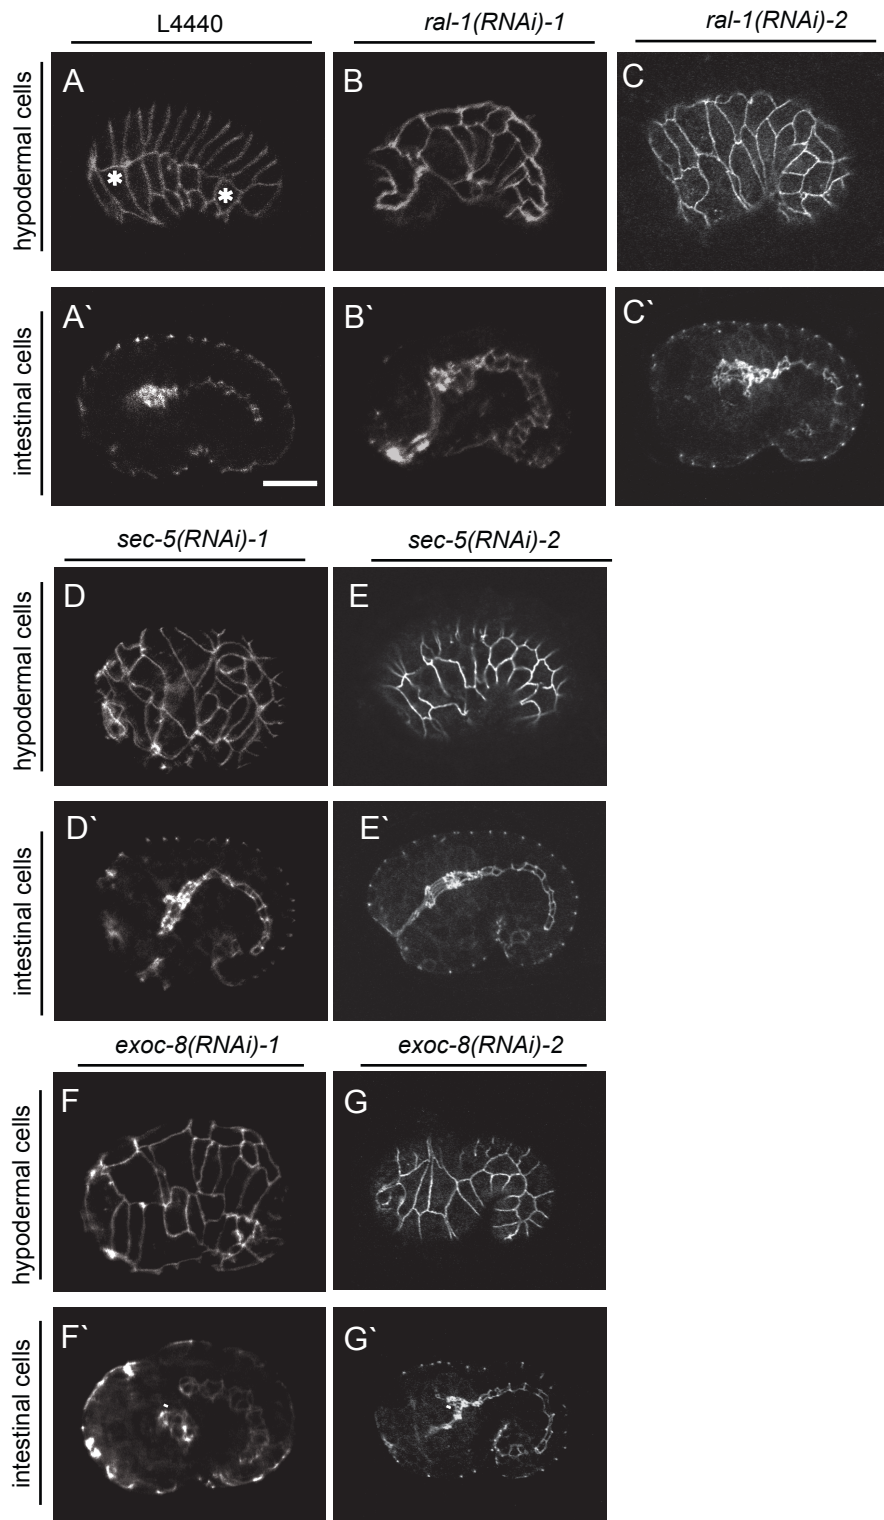

Supplement: 7601922s2.pdf [file 7601922s2.pdf]

Supplementary figure 3

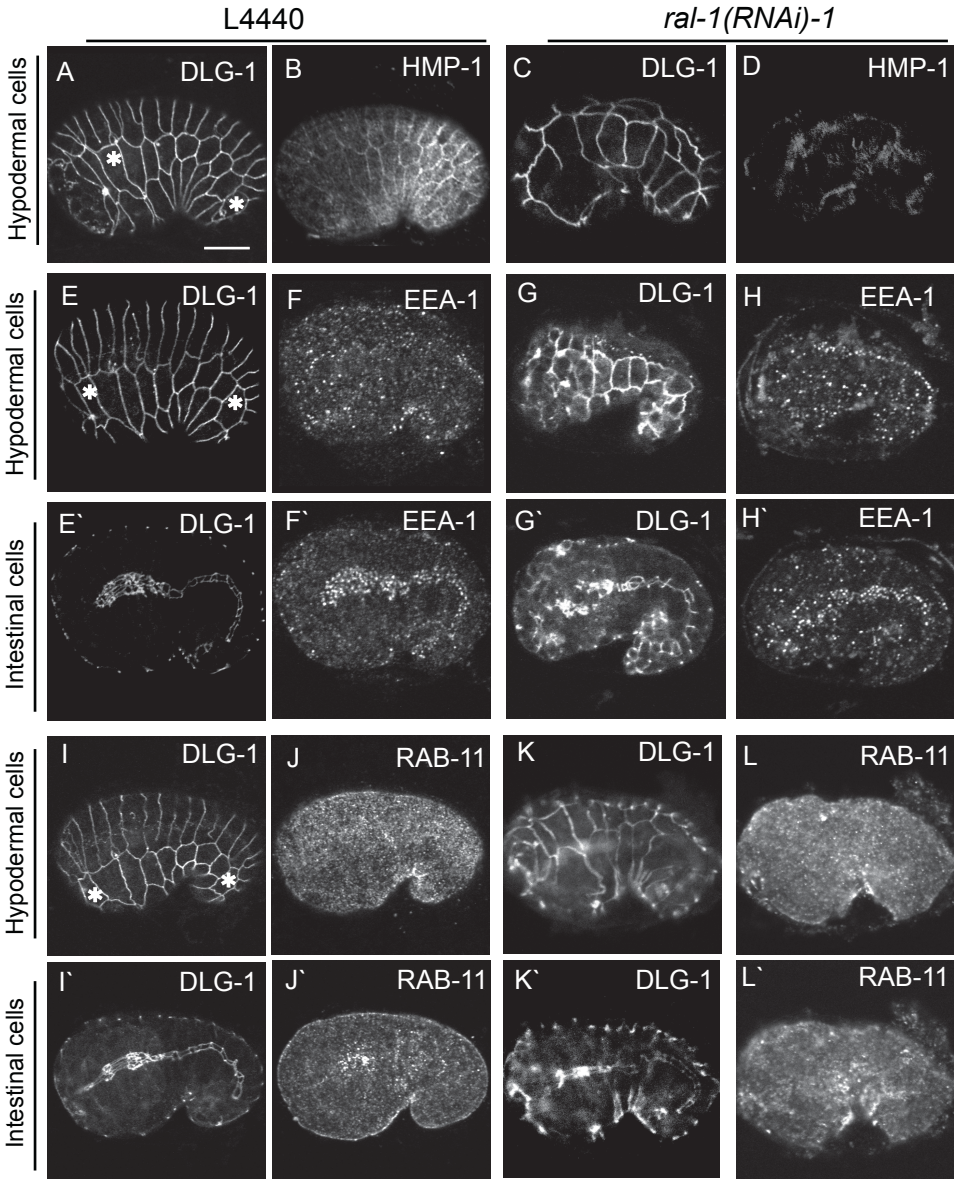

Supplement: 7601922s3.pdf [file 7601922s3.pdf]

Supplementary figure 4

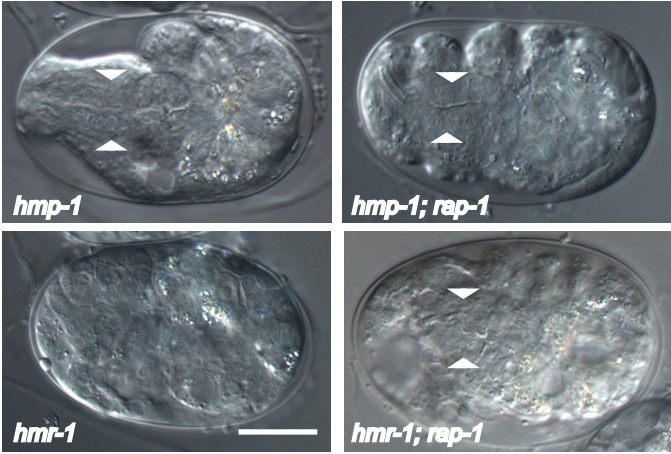

Supplement: 7601922s4.pdf [file 7601922s4.pdf]
